# Supplementary material for: Breaking up classroom sitting time with cognitively engaging physical activity: Behavioural and brain responses
Source: PLOS journal article supplement (doi:10.1371/journal.pone.0253733), 2021-07-14
Supplement: S3 (10.1371/journal.pone.0253733.s003) [file journal.pone.0253733.s003]

**S2 Table. Haemodynamic response data processing pipeline and MATLAB processing script.**

| Process                                                                                                                                                                                                                                                                                                                                  | Specific                       | Value        | Description                                                                                                                                                                                                                                                                                                               |
|------------------------------------------------------------------------------------------------------------------------------------------------------------------------------------------------------------------------------------------------------------------------------------------------------------------------------------------|--------------------------------|--------------|---------------------------------------------------------------------------------------------------------------------------------------------------------------------------------------------------------------------------------------------------------------------------------------------------------------------------|
| HMR intensity to OD                                                                                                                                                                                                                                                                                                                      | n/a                            | n/a          | The intensity data (number of time points multiplied by the number of data channels) are divided by the mean, and then converted to the change in OD.                                                                                                                                                                     |
| HMR motion artefact remover by channel                                                                                                                                                                                                                                                                                                   | Time motion window (s)         | 0.5          | These filters identify and remove motion artefacts. Segments of data channels that exhibit a change that are greater than: (i) the SD threshold multiplied by the SD of the intensity data, and/or (ii) the indicated amplitude threshold, within an indicated time range, are marked as artefacts for +/- the mask time. |
|                                                                                                                                                                                                                                                                                                                                          | Time mask (s)                  | 1.0          |                                                                                                                                                                                                                                                                                                                           |
|                                                                                                                                                                                                                                                                                                                                          | SD threshold                   | 50.0         |                                                                                                                                                                                                                                                                                                                           |
|                                                                                                                                                                                                                                                                                                                                          | Amplitude threshold            | 0.10         |                                                                                                                                                                                                                                                                                                                           |
| HMR motion correction PCA filter                                                                                                                                                                                                                                                                                                         | Number of principal components | 0.97         | This function uses PCA to filter the segments identified as motion artefacts, according to the number of principal components to remove from the data.                                                                                                                                                                    |
| HMR band pass filter                                                                                                                                                                                                                                                                                                                     | High pass filter               | 0.010        | This perform bandpass filters: high pass filter frequency (Hz), typical values between 0 and 0.02; low pass filter frequency (Hz), typical values between 0.5 and 3.                                                                                                                                                      |
|                                                                                                                                                                                                                                                                                                                                          | Low pass filter                | 0.20         |                                                                                                                                                                                                                                                                                                                           |
| HMR OD to concentrations                                                                                                                                                                                                                                                                                                                 | Partial pathlength factors     | 6.0<br>6.0   | For each wavelength, partial pathlength factors are identified. Typical values are around 6.                                                                                                                                                                                                                              |
| HMR block average                                                                                                                                                                                                                                                                                                                        | Time range (s)                 | -5.0<br>30.0 | This part of the process calculates the block average for each condition within the defined time range.                                                                                                                                                                                                                   |
| <b>MATLAB processing script</b>                                                                                                                                                                                                                                                                                                          |                                |              |                                                                                                                                                                                                                                                                                                                           |
| <pre>dod = hmrIntensity2OD(d); [tIncAuto,tIncChAuto] = hmrMotionArtifactByChannel(dod,t,SD,tIncMan,0.5,1,50,0.1); [dod,svsMotion,nSVMotion] = hmrMotionCorrectPCA(SD,dod,tIncAuto,0.97); dod = hmrBandpassFilt(dod,t,0.01,0.2); dc = hmrOD2Conc(dod,SD,[6 6]); [dcAvg,dcAvgStd,tHRF,nTrials,dcSum2] = hmrBlockAvg(dc,s,t,[-5 30]);</pre> |                                |              |                                                                                                                                                                                                                                                                                                                           |

HMR, haemo-dynamic response; OD, optical density; SD, standard deviation; PCA, principal component analysis.
